# Supplementary material for: Improvement of HER activity for MoS2: insight into the effect and mechanism of phosphorus post-doping
Source: Royal Society of Chemistry journal article supplement (doi:10.1039/c9nj05229a), 2019-12-23
Supplement: c9nj05229a1.pdf [file c9nj05229a1.pdf]

## Electronic Supplementary Information

### Improvement of HER activity for MoS<sub>2</sub>: insight into the effect and mechanism of phosphorus post-doping

Xianpei Ren<sup>a, b\*</sup>, Fan Yang<sup>c, \*</sup>, Rong Chen<sup>c</sup>, Pinyun Ren<sup>a</sup>, Yonghua Wang<sup>a</sup>

<sup>a</sup>Laboratory of Micro-Nano Photoelectric Materials and Devices, School of Physics and Electronic Engineering, Sichuan University of Science and Engineering; Key Laboratory of Green Chemistry of Sichuan Institutes of Higher Education, Zigong 643000, China.

<sup>b</sup>Key Laboratory of Advanced Energy Materials Chemistry (Ministry of Education), College of Chemistry, Nankai University, Tianjin 300071, China.

<sup>c</sup>School of Electronic and Electrical Engineering, Wuhan Textile University, Wuhan 430073, China.

\*Corresponding author: E-mail: renxianpei@163.com (X. Ren); yangfan@wtu.edu.cn (F. Yang)

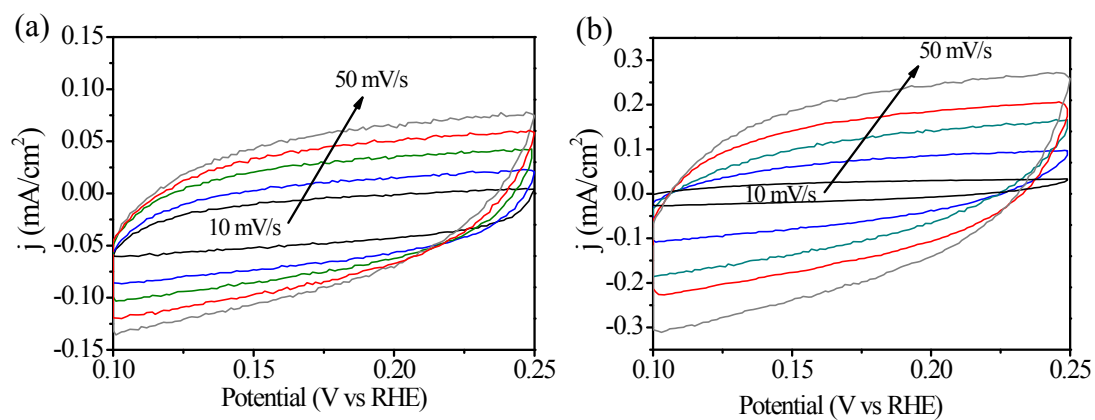

**Fig. S1** (a), (b) CV curves of MoS<sub>2</sub> and P-MoS<sub>2</sub>-2 nanosheets in the region of 0.10-0.25 V vs. RHE.
